# Supplementary material for: Evaluating field-goal shooting effectiveness in wheelchair basketball players across a competitive season: a preliminary study
Source: PeerJ. 2023 Sep 11;11:e15785. doi: 10.7717/peerj.15785 (PMC10501366; doi:10.7717/peerj.15785)
Supplement: Data S1 [file peerj-11-15785-s001.xlsx]

## Sheet: Foglio1
MATCH_NUMBER	HOME_AWAYHOME	QUARTER	WON_LOST	WINNING_LOSING_DRAWING	SHOOTING_EFFECTIVENESS	DEFENSIVE MODALITY	SHOT_POSITION_MODALITY	SHOOTING_ZONE	SCHOT_CLOCK
1	2	1	1	1	0	1	2	1	2
1	2	1	1	1	0	1	1	5	2
1	2	1	1	1	0	1	1	2	3
1	2	1	1	1	0	1	1	2	2
1	2	1	1	1	0	2	1	2	2
1	2	2	1	1	0	1	1	4	3
1	2	2	1	1	0	2	1	2	3
1	2	2	1	1	0	1	1	4	4
1	2	2	1	1	0	1	1	4	3
1	2	2	1	1	0	1	1	2	3
1	2	2	1	1	0	1	1	4	3
1	2	2	1	1	0	1	2	4	2
1	2	3	1	1	0	1	1	4	2
1	2	3	1	1	0	1	1	5	2
1	2	3	1	1	0	1	1	2	3
1	2	3	1	1	0	1	1	1	2
1	2	3	1	1	0	1	1	4	3
1	2	3	1	1	0	1	1	2	3
1	2	3	1	1	0	1	2	2	2
1	2	3	1	1	0	1	1	2	2
1	2	3	1	1	0	1	1	2	3
1	2	4	1	1	0	1	1	2	1
1	2	4	1	1	0	1	1	1	1
1	2	4	1	1	0	1	1	1	3
1	2	4	1	1	0	2	2	2	1
1	2	4	1	1	0	1	1	4	2
1	2	4	1	1	0	1	1	2	1
1	2	4	1	1	0	1	1	2	2
2	1	1	2	2	0	1	2	1	3
2	1	1	2	2	0	1	1	5	1
2	1	1	2	2	0	1	1	4	2
2	1	1	2	2	0	1	2	1	1
2	1	1	2	2	0	1	1	5	1
2	1	2	2	2	0	1	1	2	3
2	1	2	2	2	0	1	1	1	3
2	1	2	2	2	0	1	1	4	1
2	1	2	2	2	0	1	1	2	1
2	1	2	2	2	0	1	2	2	2
2	1	2	2	2	0	1	1	4	2
2	1	2	2	2	0	1	1	5	1
2	1	3	2	2	0	1	1	5	2
2	1	3	2	2	0	1	1	4	3
2	1	3	2	2	0	1	2	2	2
2	1	3	2	2	0	1	1	5	2
2	1	3	2	2	0	1	1	4	2
2	1	3	2	2	0	1	1	1	1
2	1	3	2	2	0	1	1	5	1
2	1	3	2	2	0	1	1	2	3
2	1	4	2	2	0	1	1	1	3
2	1	4	2	2	0	1	1	4	2
2	1	4	2	2	0	1	1	4	2
2	1	4	2	2	0	1	1	4	2
2	1	4	2	2	0	1	2	2	3
2	1	4	2	2	0	1	1	5	1
2	1	4	2	2	0	1	1	2	3
2	1	4	2	2	0	1	1	1	2
3	2	1	1	1	0	1	1	2	1
3	2	1	1	3	0	2	2	2	2
3	2	1	1	3	0	1	1	2	3
3	2	1	1	3	0	1	1	1	2
3	2	1	1	3	0	1	1	2	3
3	2	1	1	3	0	1	2	4	2
3	2	1	1	3	0	1	2	2	1
3	2	1	1	3	0	1	1	1	3
3	2	2	1	3	0	1	2	2	3
3	2	2	1	3	0	1	1	2	3
3	2	2	1	2	0	1	1	1	3
3	2	2	1	2	0	1	1	4	2
3	2	2	1	2	0	1	1	4	2
3	2	2	1	2	0	1	1	2	2
3	2	2	1	2	0	1	1	2	3
3	2	3	1	2	0	1	1	1	4
3	2	3	1	2	0	1	1	1	2
3	2	3	1	2	0	1	1	2	3
3	2	3	1	2	0	1	2	2	2
3	2	3	1	2	0	2	2	2	4
3	2	3	1	2	0	1	1	2	3
3	2	3	1	2	0	2	2	2	3
3	2	3	1	2	0	1	1	2	3
3	2	4	1	2	0	1	2	2	2
3	2	4	1	2	0	1	1	2	3
3	2	4	1	2	0	1	1	4	3
3	2	4	1	2	0	2	1	4	4
3	2	4	1	2	0	2	1	4	3
3	2	4	1	2	0	1	1	1	1
3	2	4	1	2	0	1	1	4	3
4	2	1	2	3	0	1	1	5	2
4	2	1	2	3	0	2	1	2	2
4	2	1	2	2	0	1	1	4	2
4	2	1	2	2	0	1	1	2	3
4	2	1	2	2	0	2	1	1	1
4	2	1	2	2	0	1	1	1	1
4	2	1	2	2	0	1	1	2	3
4	2	1	2	2	0	1	1	1	2
4	2	1	2	2	0	1	1	1	1
4	2	2	2	2	0	1	1	5	4
4	2	2	2	2	0	1	1	1	2
4	2	2	2	2	0	1	1	2	2
4	2	2	2	2	0	1	1	1	2
4	2	2	2	2	0	1	1	4	2
4	2	2	2	2	0	1	1	5	3
4	2	2	2	2	0	1	1	2	2
4	2	2	2	2	0	1	1	2	3
4	2	2	2	2	0	1	1	2	2
4	2	2	2	2	0	1	1	5	1
4	2	3	2	2	0	1	1	1	3
4	2	3	2	2	0	1	1	2	3
4	2	3	2	2	0	1	1	2	3
4	2	3	2	2	0	1	1	1	3
4	2	3	2	2	0	1	1	2	3
4	2	3	2	2	0	1	1	1	3
4	2	3	2	2	0	1	1	5	2
4	2	3	2	2	0	1	1	5	3
4	2	3	2	2	0	1	1	4	2
4	2	4	2	2	0	1	1	1	3
4	2	4	2	2	0	2	1	5	1
4	2	4	2	2	0	1	1	2	1
4	2	4	2	2	0	1	1	4	1
4	2	4	2	2	0	2	1	5	3
4	2	4	2	2	0	1	1	1	2
4	2	4	2	2	0	1	1	2	2
4	2	4	2	2	0	1	1	1	2
4	2	4	2	2	0	2	1	1	1
4	2	4	2	2	0	1	1	2	2
4	2	4	2	2	0	2	1	2	3
4	2	4	2	2	0	1	1	2	4
4	2	4	2	2	0	1	1	2	2
4	2	4	2	2	0	1	1	2	3
5	1	1	1	3	0	1	1	4	1
5	1	1	1	3	0	1	1	4	2
5	1	1	1	1	0	1	1	4	3
5	1	2	1	1	0	2	2	2	4
5	1	2	1	1	0	1	1	4	3
5	1	2	1	1	0	1	1	1	3
5	1	2	1	1	0	1	1	2	3
5	1	2	1	1	0	1	1	1	2
5	1	2	1	1	0	1	1	4	1
5	1	2	1	1	0	1	2	2	3
5	1	3	1	1	0	1	1	4	3
5	1	3	1	1	0	2	1	1	2
5	1	3	1	1	0	2	2	2	1
5	1	3	1	1	0	1	1	2	1
5	1	4	1	1	0	1	1	1	2
5	1	4	1	1	0	1	2	2	3
5	1	4	1	1	0	2	2	2	3
5	1	4	1	1	0	1	1	2	3
5	1	4	1	1	0	1	1	2	3
5	1	4	1	1	0	1	1	2	2
5	1	4	1	1	0	1	1	2	3
5	1	4	1	1	0	1	1	2	2
6	2	1	2	1	0	1	1	1	3
6	2	1	2	2	0	1	1	4	2
6	2	2	2	2	0	1	1	5	1
6	2	2	2	2	0	1	1	4	2
6	2	2	2	2	0	1	1	5	2
6	2	2	2	2	0	1	1	4	2
6	2	2	2	2	0	1	1	2	3
6	2	2	2	2	0	2	2	4	1
6	2	2	2	2	0	1	1	1	3
6	2	2	2	2	0	2	2	4	4
6	2	2	2	2	0	2	1	1	2
6	2	3	2	2	0	1	1	4	2
6	2	3	2	2	0	1	1	4	2
6	2	3	2	2	0	1	1	2	3
6	2	3	2	2	0	1	1	1	2
6	2	4	2	2	0	1	1	1	2
6	2	4	2	2	0	1	1	2	3
6	2	4	2	2	0	2	1	1	1
6	2	4	2	2	0	1	1	4	3
6	2	4	2	2	0	1	1	1	1
6	2	4	2	2	0	1	1	4	2
6	2	4	2	2	0	1	1	4	1
7	1	1	1	1	0	1	1	1	1
7	1	1	1	3	0	1	1	5	1
7	1	1	1	3	0	1	1	4	2
7	1	1	1	1	0	1	1	5	1
7	1	1	1	1	0	1	2	2	3
7	1	1	1	1	0	1	2	2	3
7	1	2	1	1	0	1	2	2	3
7	1	2	1	1	0	1	1	2	1
7	1	2	1	1	0	1	1	1	1
7	1	2	1	1	0	1	2	2	3
7	1	2	1	1	0	1	1	2	2
7	1	3	1	1	0	1	1	2	2
7	1	3	1	1	0	1	1	2	1
7	1	3	1	1	0	1	1	5	1
7	1	3	1	1	0	1	1	2	3
7	1	4	1	1	0	1	1	1	1
7	1	4	1	1	0	1	1	1	2
7	1	4	1	1	0	1	1	4	2
7	1	4	1	1	0	1	1	1	2
7	1	4	1	1	0	1	1	4	3
7	1	4	1	1	0	1	2	4	2
1	2	1	1	3	1	1	1	4	3
1	2	1	1	1	1	1	1	1	1
1	2	1	1	1	1	1	1	2	3
1	2	1	1	1	1	2	2	2	3
1	2	2	1	1	1	2	2	2	4
1	2	2	1	1	1	2	1	4	3
1	2	2	1	1	1	2	1	1	1
1	2	2	1	1	1	1	1	4	2
1	2	2	1	1	1	1	1	5	2
1	2	3	1	1	1	2	1	2	3
1	2	3	1	1	1	1	1	1	2
1	2	3	1	1	1	1	1	2	1
1	2	4	1	1	1	1	1	4	3
1	2	4	1	1	1	1	1	4	2
2	1	1	2	2	1	1	1	2	3
2	1	2	2	2	1	1	1	5	1
2	1	2	2	2	1	1	1	1	2
2	1	3	2	2	1	1	2	2	4
2	1	3	2	2	1	1	1	5	3
2	1	4	2	2	1	2	1	1	3
2	1	4	2	2	1	1	1	5	2
2	1	4	2	2	1	1	1	5	2
2	1	4	2	2	1	1	2	2	2
2	1	4	2	2	1	1	1	2	3
2	1	4	2	2	1	1	2	2	1
3	2	1	1	3	1	1	1	2	3
3	2	1	1	3	1	1	1	2	3
3	2	1	1	3	1	1	1	1	3
3	2	1	1	3	1	1	1	2	2
3	2	1	1	1	1	2	2	4	2
3	2	1	1	1	1	1	2	2	2
3	2	2	1	3	1	1	1	1	2
3	2	2	1	2	1	1	1	1	2
3	2	2	1	2	1	1	1	1	3
3	2	2	1	2	1	2	1	1	1
3	2	2	1	2	1	2	1	4	4
3	2	3	1	2	1	1	1	2	3
3	2	3	1	2	1	1	1	2	3
3	2	3	1	2	1	2	1	1	3
3	2	3	1	2	1	2	1	2	1
3	2	3	1	2	1	1	1	2	2
3	2	4	1	2	1	1	1	2	3
3	2	4	1	2	1	1	1	2	4
3	2	4	1	2	1	1	2	2	3
4	2	2	2	2	1	1	1	4	3
4	2	2	2	2	1	1	1	4	2
4	2	2	2	2	1	1	1	1	2
4	2	2	2	2	1	1	1	2	2
4	2	3	2	2	1	1	1	1	2
4	2	3	2	2	1	2	1	1	2
4	2	3	2	2	1	2	1	2	3
4	2	3	2	2	1	2	1	2	3
4	2	3	2	2	1	1	1	2	4
4	2	4	2	2	1	1	1	2	3
4	2	4	2	2	1	1	1	2	3
5	1	1	1	2	1	1	1	2	3
5	1	1	1	1	1	1	2	2	3
5	1	1	1	1	1	1	2	2	3
5	1	1	1	1	1	1	2	2	3
5	1	1	1	1	1	1	1	1	2
5	1	1	1	1	1	1	1	2	3
5	1	1	1	1	1	2	1	2	2
5	1	1	1	1	1	1	1	2	2
5	1	1	1	1	1	1	1	2	3
5	1	2	1	1	1	1	1	4	2
5	1	2	1	1	1	1	1	2	4
5	1	2	1	1	1	1	1	2	3
5	1	2	1	1	1	2	2	2	3
5	1	2	1	1	1	1	1	1	2
5	1	2	1	1	1	2	1	4	2
5	1	2	1	1	1	1	1	4	3
5	1	2	1	1	1	1	1	2	1
5	1	2	1	1	1	1	2	2	3
5	1	3	1	1	1	1	1	2	3
5	1	3	1	1	1	1	1	2	3
5	1	3	1	1	1	1	1	2	3
5	1	3	1	1	1	1	1	4	3
5	1	3	1	1	1	2	2	2	3
5	1	3	1	1	1	1	1	2	3
5	1	3	1	1	1	2	2	2	3
5	1	3	1	1	1	1	1	2	2
5	1	3	1	1	1	2	1	2	3
5	1	4	1	1	1	1	1	2	4
5	1	4	1	1	1	2	1	2	3
5	1	4	1	1	1	1	1	4	3
5	1	4	1	1	1	2	2	2	4
5	1	4	1	1	1	1	1	5	2
5	1	4	1	1	1	1	1	1	3
5	1	4	1	1	1	2	1	1	2
5	1	4	1	1	1	1	1	2	3
5	1	4	1	1	1	1	1	5	3
5	1	4	1	1	1	1	2	4	1
6	2	1	2	3	1	1	1	5	2
6	2	1	2	2	1	1	1	2	2
6	2	1	2	3	1	1	1	1	3
6	2	1	2	2	1	1	1	1	3
6	2	1	2	2	1	2	1	4	3
6	2	2	2	2	1	2	1	2	2
6	2	2	2	2	1	1	1	1	2
6	2	3	2	2	1	1	1	5	2
6	2	3	2	2	1	1	2	2	4
6	2	3	2	2	1	1	1	1	3
6	2	3	2	2	1	2	1	1	3
6	2	3	2	2	1	2	2	2	3
6	2	3	2	2	1	2	2	2	3
6	2	3	2	2	1	2	2	2	3
6	2	3	2	2	1	1	2	2	2
6	2	3	2	2	1	2	1	2	1
6	2	4	2	2	1	2	1	1	3
6	2	4	2	2	1	1	1	4	3
7	1	1	1	3	1	1	1	4	2
7	1	1	1	3	1	1	1	1	2
7	1	1	1	1	1	1	1	1	3
7	1	1	1	1	1	1	1	4	1
7	1	1	1	1	1	1	2	2	3
7	1	1	1	1	1	1	1	2	2
7	1	1	1	1	1	1	2	2	1
7	1	2	1	1	1	2	2	2	3
7	1	2	1	1	1	1	2	2	3
7	1	2	1	1	1	1	1	2	3
7	1	2	1	1	1	2	2	2	2
7	1	2	1	1	1	1	1	2	1
7	1	2	1	1	1	1	1	2	2
7	1	2	1	1	1	1	1	1	1
7	1	2	1	1	1	1	2	2	3
7	1	2	1	1	1	1	1	2	3
7	1	2	1	1	1	1	2	2	3
7	1	3	1	1	1	1	1	1	2
7	1	3	1	1	1	2	2	2	2
7	1	3	1	1	1	1	2	2	2
7	1	3	1	1	1	1	1	2	1
7	1	3	1	1	1	1	2	2	3
7	1	3	1	1	1	1	1	2	3
7	1	3	1	1	1	1	1	1	2
7	1	3	1	1	1	1	1	4	2
7	1	3	1	1	1	1	1	4	1
7	1	4	1	1	1	1	1	4	2
7	1	4	1	1	1	2	2	2	2
7	1	4	1	1	1	1	1	1	2
7	1	4	1	1	1	1	1	4	2

## Sheet: Foglio2
PARTITA_NUMERO
ANDATA_RITORNO
CARATTERISTICHE_AZIONE
CASA_FUORI
QUARTO
VINTO_PERSO
GIOCATORE
GIOCATORE_PT
W_PE_PA
CANESTRO_SI_NO
SHOT_CLOCK
SHOT_CLOCK_6
SHOT_CLOCK_4
CARROZZINE_CONTATTO_NR
BRACCIO_ALZATO_NONALZATO
AREA_TIRO
FERMO_INMOVIMENTO
filter_$
AREA_TRIS
SC_FRANCIS
SC_FRANCIS2
